# Supplementary material
Source: PubMed Central journal article supplement (PMC7590501)
Supplement: NIHMS1544787-supplement-1.pdf [file NIHMS1544787-supplement-1.pdf]

## Supplementary Data for

### Optimized Timing of Post-Transplantation Cyclophosphamide in MHC-Haploidentical Murine Hematopoietic Cell Transplantation

Lucas P. Wachsmuth,<sup>1</sup> Michael T. Patterson,<sup>1</sup> Michael A. Eckhaus,<sup>2</sup> David J. Venzon,<sup>3</sup>  
Christopher G. Kanakry<sup>1</sup>

<sup>1</sup>Experimental Transplantation and Immunology Branch, Center for Cancer Research, National Cancer Institute, National Institutes of Health, Bethesda, Maryland, USA;

<sup>2</sup>Division of Veterinary Resources, Office of Research Services, National Institutes of Health, Bethesda, Maryland, USA;

<sup>3</sup>Biostatistics and Data Management Section, Office of the Clinical Director, Center for Cancer Research, National Cancer Institute, National Institutes of Health, Bethesda, Maryland, USA

This PDF file includes:

**Figure S1.** Absolute numbers of alloreactive effector T cells at days +7 and +21.

**Figure S2.** Median and mean fluorescence intensities of Ki-67 for alloreactive effector T cells at day +7.

**Figure S3.** Absolute numbers of CD4<sup>+</sup>CD25<sup>+</sup>Foxp3<sup>+</sup> regulatory T cells at days +7

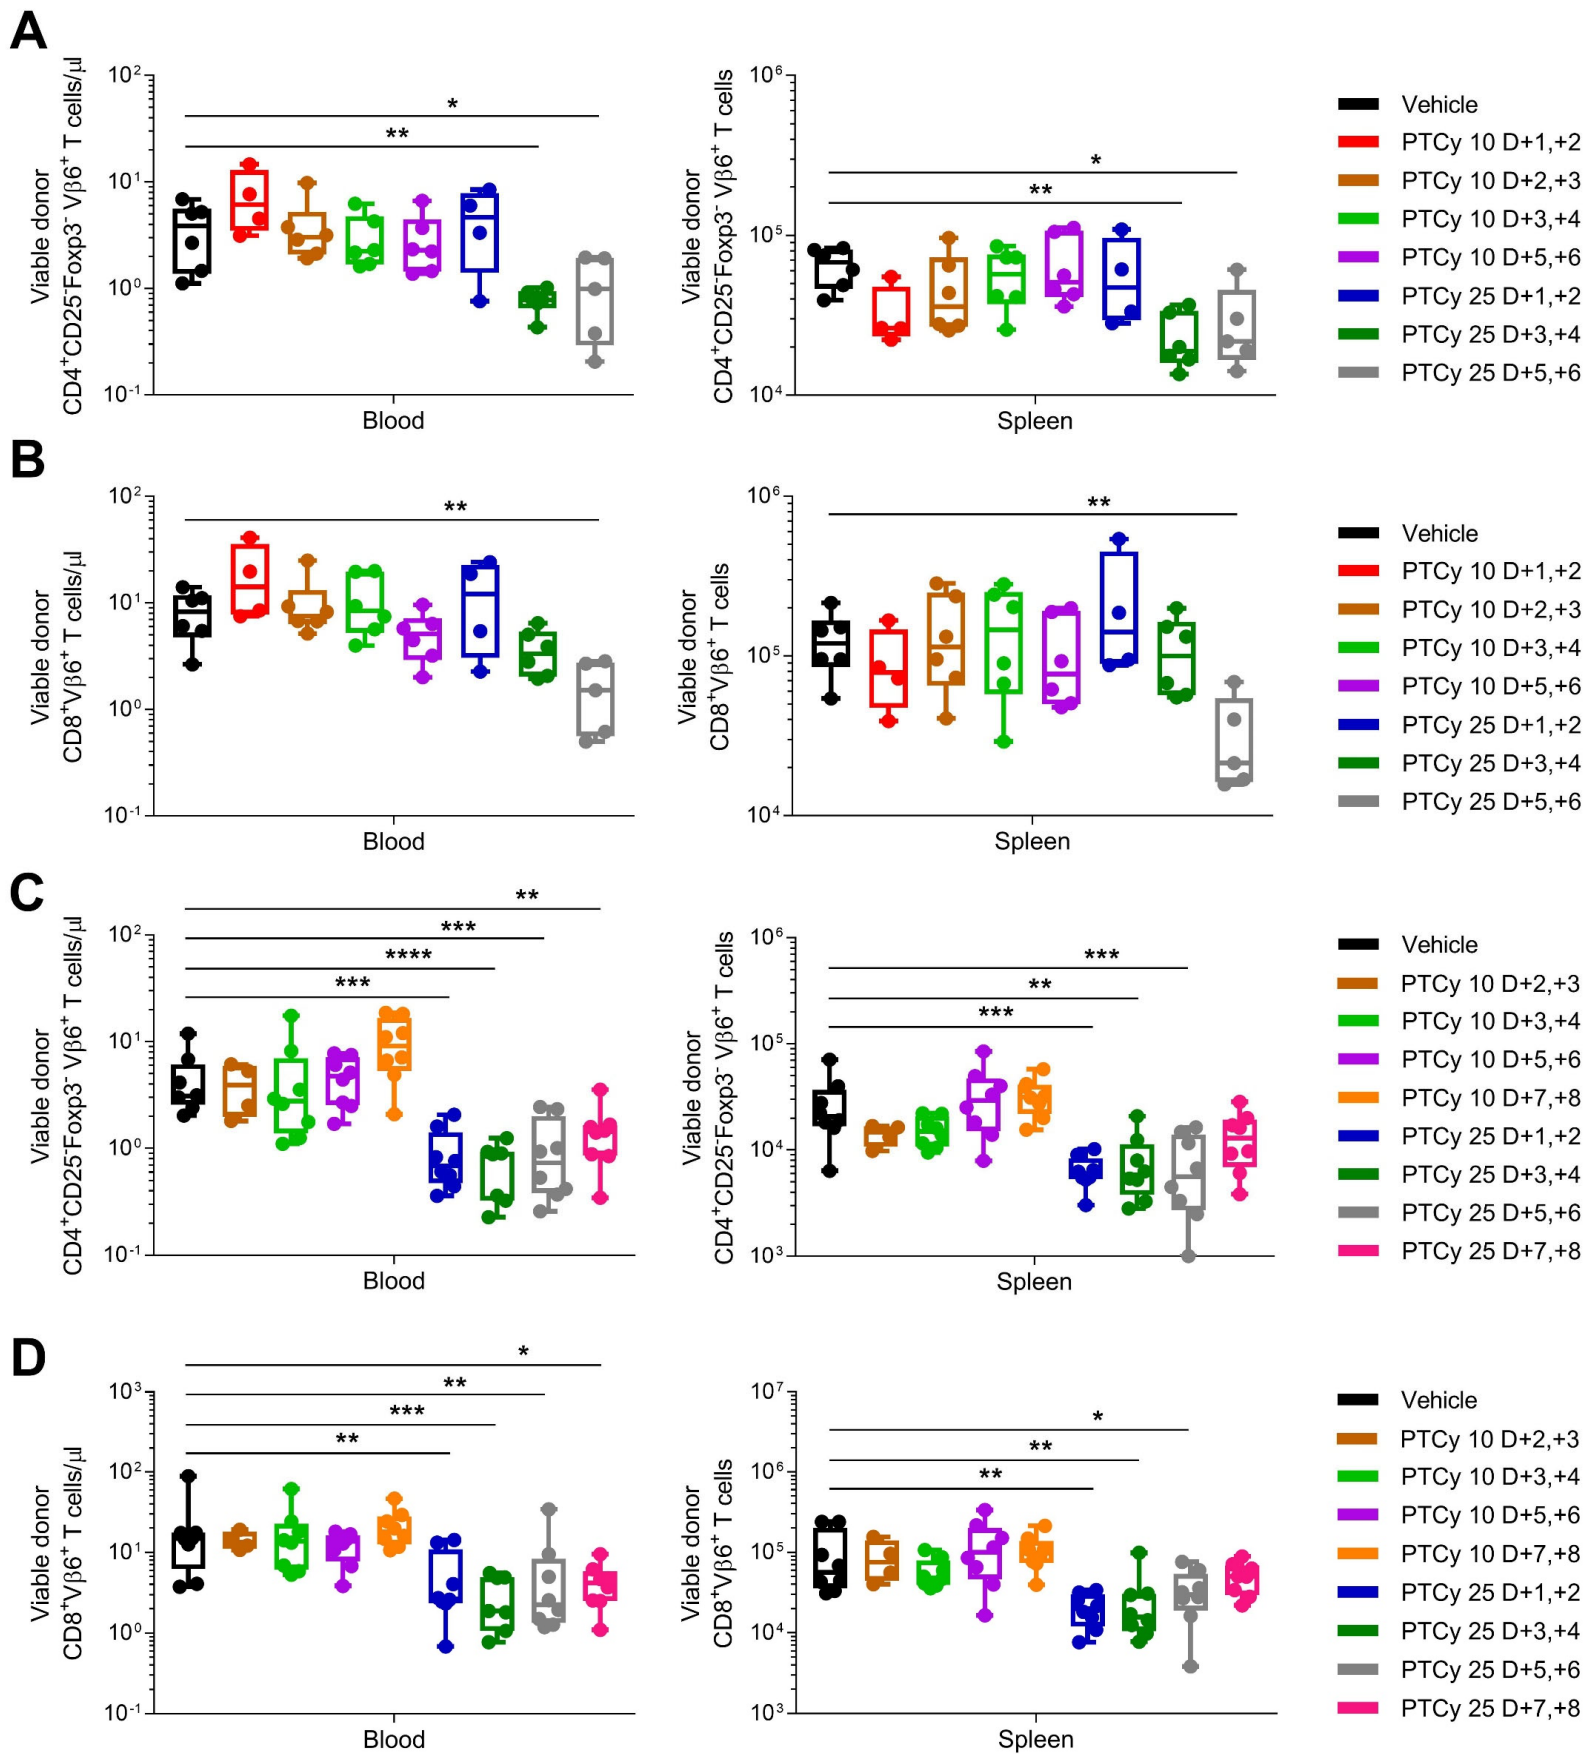

**Figure S1. Absolute numbers of alloreactive effector T cells at days +7 and +21.** For days (A-B) +7 and (C-D) +21, absolute numbers of (A,C) CD4<sup>+</sup>CD25<sup>-</sup>Foxp3<sup>-</sup>Vβ6<sup>+</sup> T cells or (B,D) CD8<sup>+</sup>Vβ6<sup>+</sup> T cells are shown corresponding to the data shown in Figure 6A-B. Total numbers were calculated for each sample by taking the total number of gated events divided by the total number of flow cytometrically determined viable (LIVE/DEAD<sup>-</sup>) events and then multiplying by the total number of viable cells as determined by hemacytometric counting using trypan blue exclusion. \*p≤0.05, \*\*p≤0.01, \*\*\*p≤0.001, \*\*\*\*p≤0.0001 on one-way ANOVA followed by the Holm-Sidak post hoc test using the vehicle-treated group as the control.

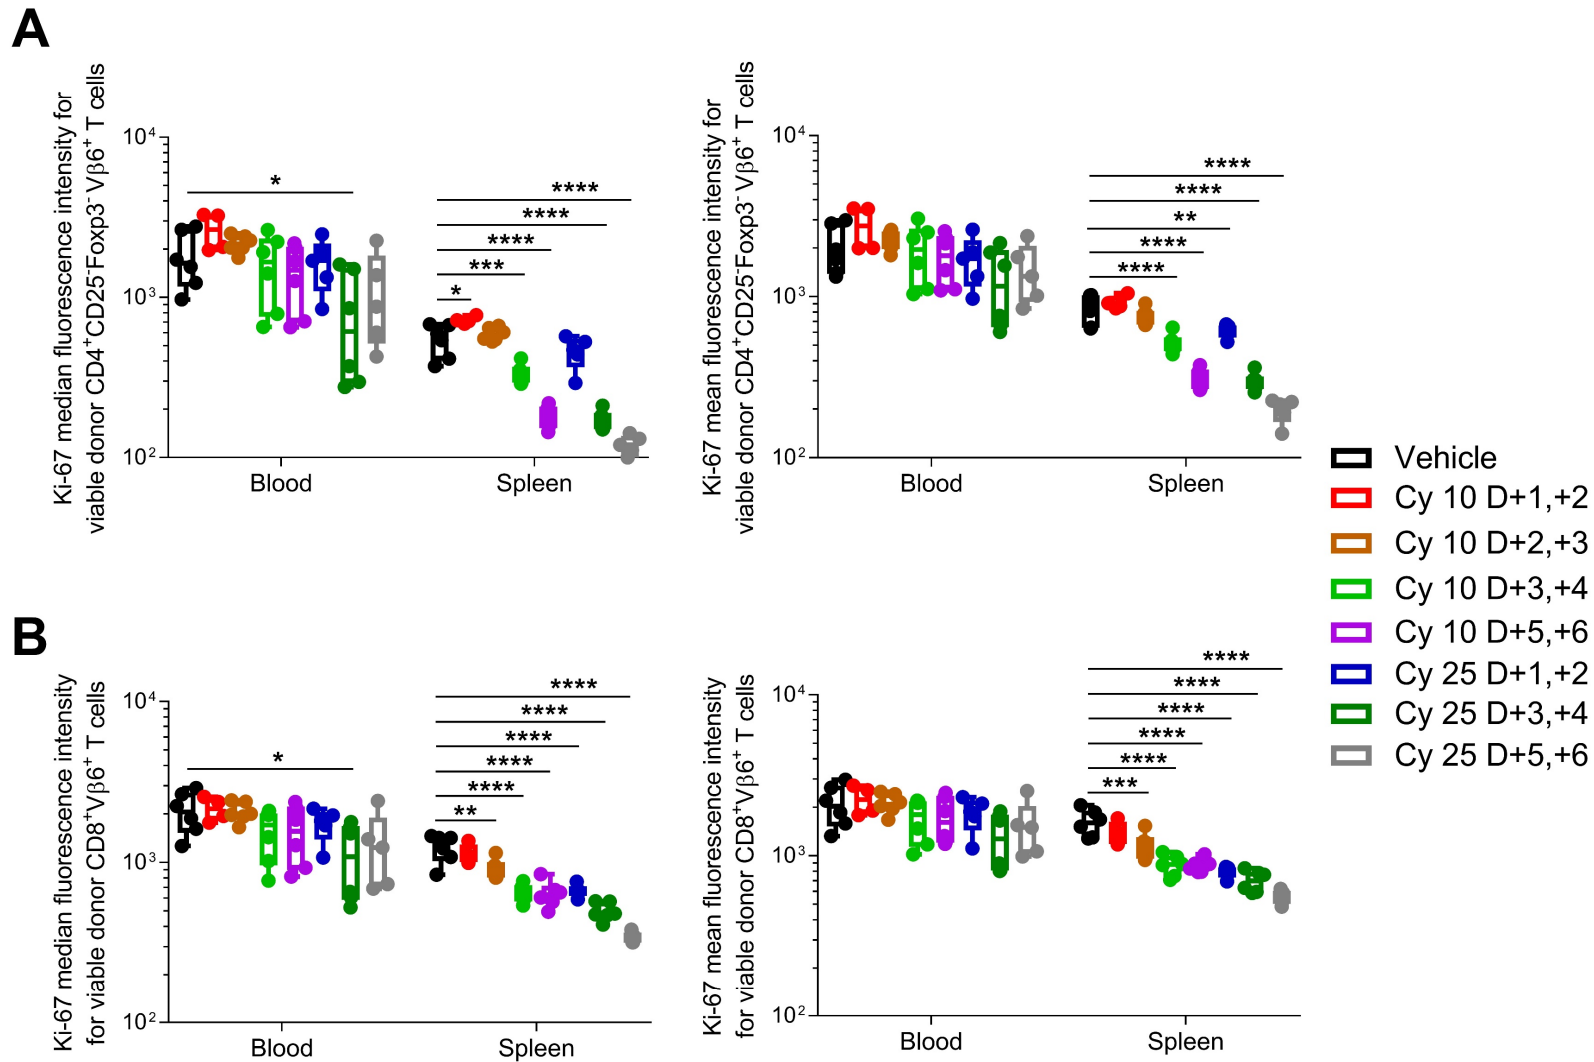

**Figure S2. Median and mean fluorescence intensities of Ki-67 for alloreactive effector T cells at day +7.** (Left) median fluorescence intensities and (Right) mean fluorescence intensities of Ki-67 within (A) CD4<sup>+</sup>CD25<sup>-</sup>Foxp3<sup>-</sup>Vβ6<sup>+</sup> T cells or (B) CD8<sup>+</sup>Vβ6<sup>+</sup> T cells are shown. These data correspond to the data shown in Figure 6C and show overall similar results. The median fluorescence intensities of the fluorescence-minus-one (FMO) controls for the two experiments were -64 and -46 for CD4<sup>+</sup>CD25<sup>-</sup>Foxp3<sup>-</sup>Vβ6<sup>+</sup> T cells and -26 and 20 for CD8<sup>+</sup>Vβ6<sup>+</sup> T cells. The mean fluorescence intensities of the FMO controls for the two experiments were -73 and -53 for CD4<sup>+</sup>CD25<sup>-</sup>Foxp3<sup>-</sup>Vβ6<sup>+</sup> T cells and -37 and 24 for CD8<sup>+</sup>Vβ6<sup>+</sup> T cells. \*p≤0.05, \*\*p≤0.01, \*\*\*p≤0.001, \*\*\*\*p≤0.0001 on one-way ANOVA followed by the Holm-Sidak post hoc test using the vehicle-treated group as the control.

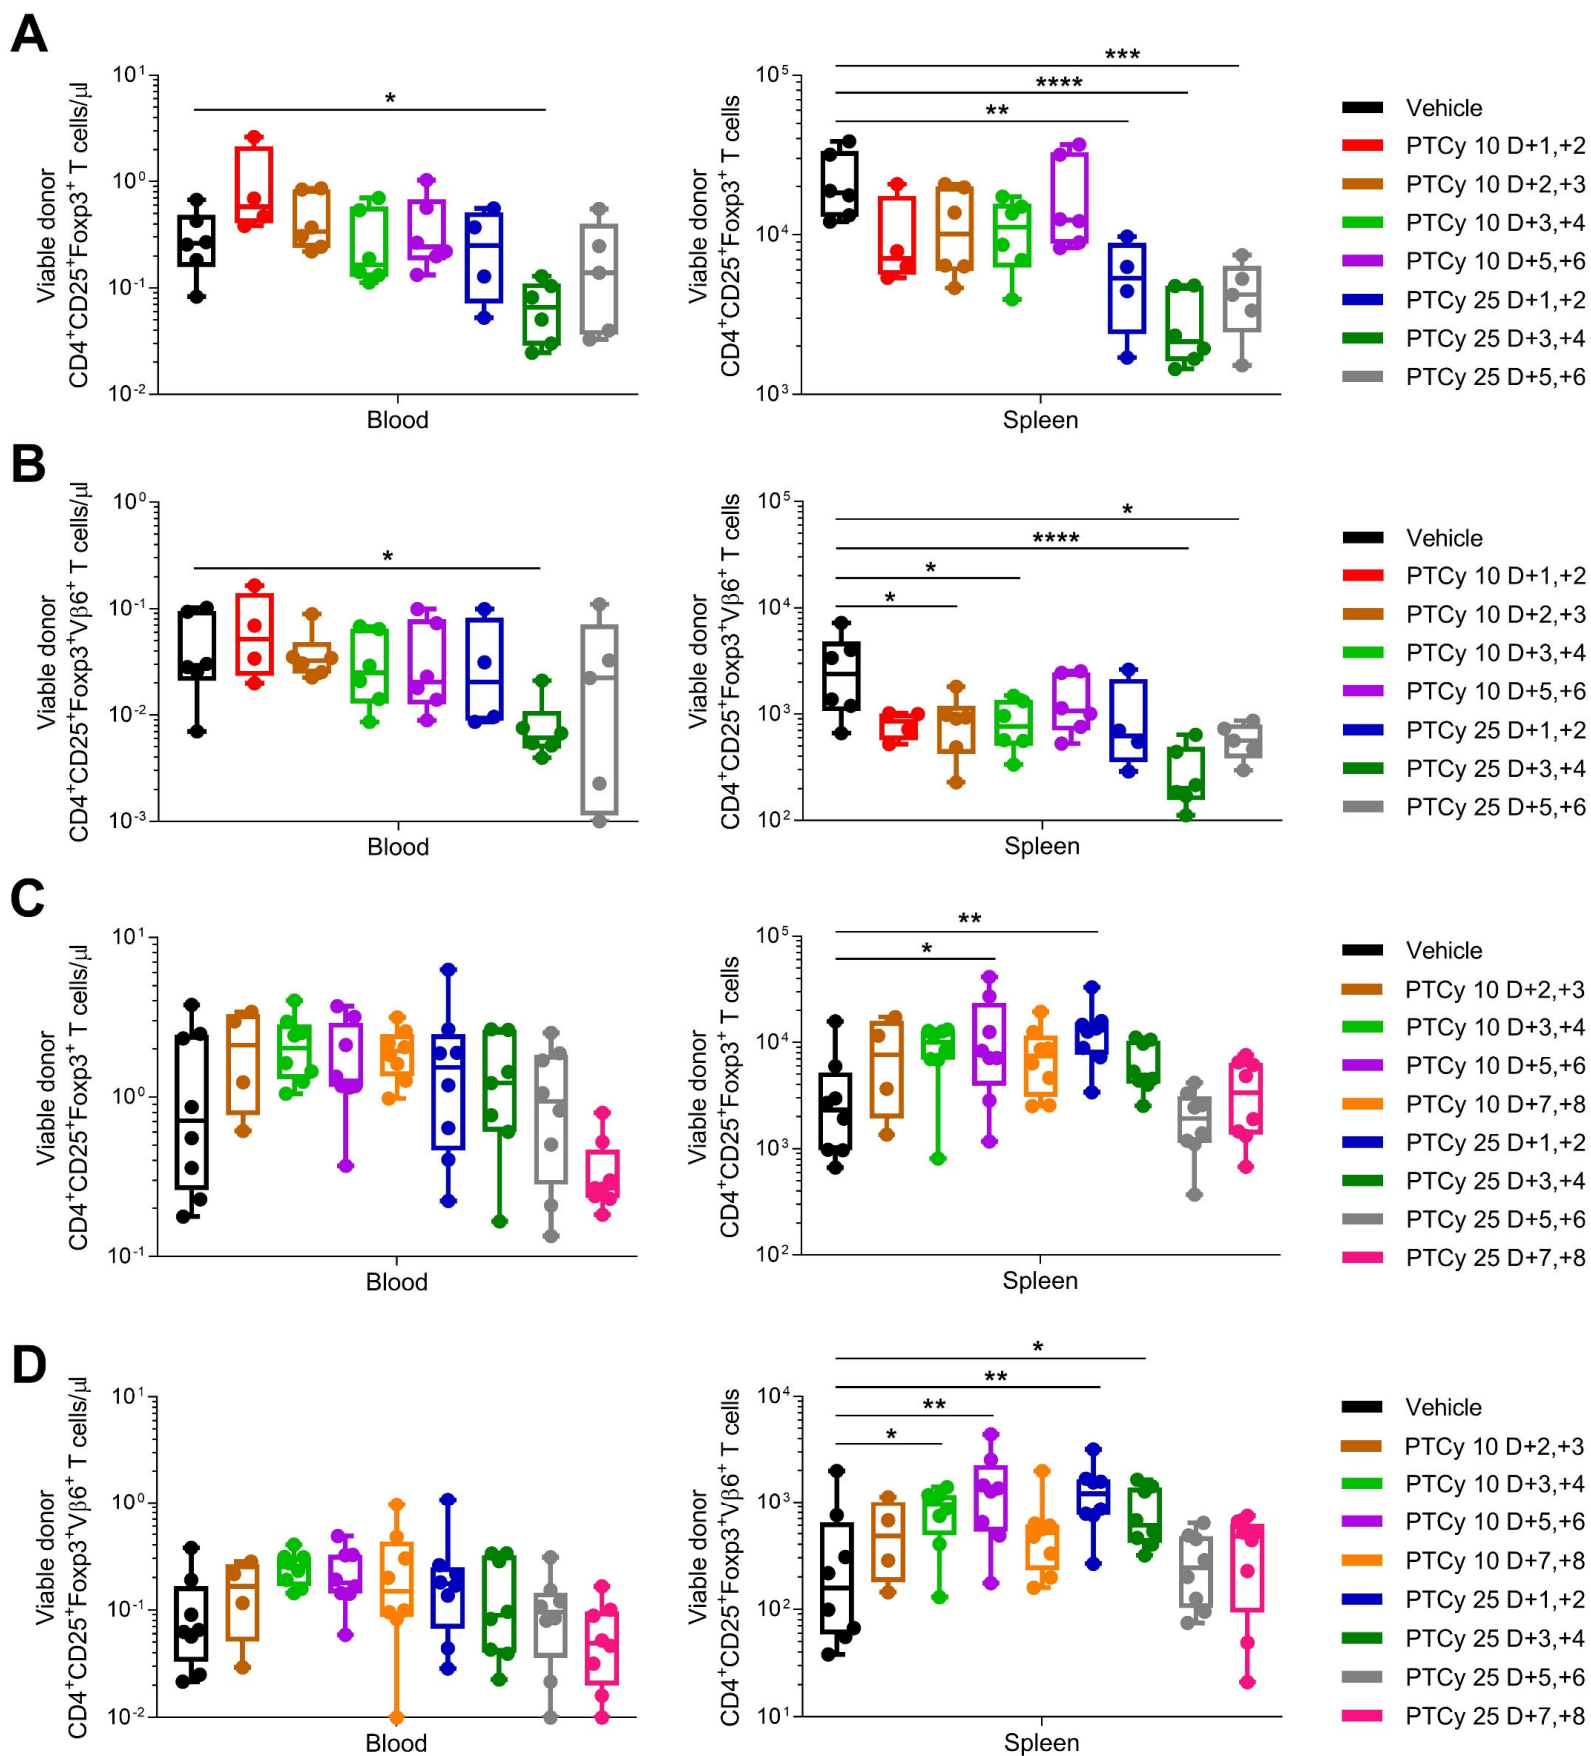

**Figure S3. Absolute numbers of  $CD4^+CD25^+Foxp3^+$  regulatory T cells at days +7 and +21.** For days (A-B) +7 and (C-D) +21, absolute numbers of (A,C) total  $CD4^+CD25^+Foxp3^+$  T cells or (B,D)  $CD4^+CD25^+Foxp3^+V\beta6^+$  T cells are shown corresponding to the data shown in Figure 7A-D. Total numbers were calculated for each sample by taking the total number of gated events divided by the total number of flow cytometrically determined viable (LIVE/DEAD<sup>-</sup>) events and then multiplying by the total number of viable cells as determined by hemacytometric counting using trypan blue exclusion. \* $p \leq 0.05$ , \*\* $p \leq 0.01$ , \*\*\* $p \leq 0.001$ , \*\*\*\* $p \leq 0.0001$  on one-way ANOVA followed by the Holm-Sidak post hoc test using the vehicle-treated group as the control.
